# Supplementary material for: A novel approach for haplotype-based association analysis using family data
Source: PubMed Central journal article supplement (PMC3009518; doi:10.1186/1471-2105-11-s1-s45), 2010-01-18

## Appendix

Table A1 - Haplotype frequency distribution of CF dataset.

| Serial No. | Haplotype                                 | Frequency |
|------------|-------------------------------------------|-----------|
| 1          | 1 1 1 2 2 2 1 1 2 1 2 1 2 1 2 1 1 1 1     | 0.19643   |
| 2          | 1 1 1 2 2 2 1 1 2 1 2 1 2 1 2 1 2 2 2     | 0.17857   |
| 3          | 2 1 2 2 2 2 1 1 2 1 2 1 2 1 2 1 1 1 1     | 0.07143   |
| 4          | 2 1 2 2 1 1 1 1 2 1 2 1 2 1 2 1 2 2 2     | 0.05357   |
| 5          | 1 1 1 1 1 1 1 1 2 1 2 1 2 1 2 1 2 1 1     | 0.03571   |
| 6          | 2 1 2 1 1 1 1 1 2 1 2 2 2 2 2 1 2 2 2     | 0.03571   |
| 7          | 2 1 2 2 1 1 1 1 2 1 2 1 2 1 2 1 1 1 1     | 0.03571   |
| 8          | 1 1 1 1 1 1 1 1 2 1 2 1 2 1 2 1 1 1 1     | 0.01786   |
| 9          | 1 1 1 1 1 1 2 2 1 2 1 2 1 1 1 1 2 2 2     | 0.01786   |
| 10         | 1 1 1 1 2 2 1 1 2 1 2 1 2 1 2 1 1 1 1     | 0.01786   |
| 11         | 1 1 1 1 2 2 1 1 2 1 2 1 2 1 2 1 2 2 2     | 0.01786   |
| 12         | 1 1 1 2 1 1 1 1 2 1 2 1 2 1 2 1 2 2 2     | 0.01786   |
| 13         | 1 1 1 2 1 1 1 2 1 2 1 2 1 1 1 1 2 2 1 1   | 0.01786   |
| 14         | 1 1 1 2 1 1 2 1 1 2 1 2 1 2 1 1 1 1 2 2 2 | 0.01786   |
| 15         | 1 1 1 2 1 2 1 1 2 1 2 1 2 1 2 1 1 1 1     | 0.01786   |
| 16         | 1 1 2 2 1 1 1 2 1 2 1 2 1 1 1 1 1 1 1     | 0.01786   |
| 17         | 2 1 1 1 2 2 1 2 1 2 1 2 1 1 1 1 2 1 2     | 0.01786   |
| 18         | 2 1 1 2 1 1 2 1 2 1 2 2 2 2 1 1 1 1 1     | 0.01786   |
| 19         | 2 1 2 1 1 1 1 1 2 1 2 1 2 1 2 1 1 1 1     | 0.01786   |
| 20         | 2 1 2 1 1 1 1 1 2 1 2 2 2 2 2 1 1 1 1     | 0.01786   |
| 21         | 2 1 2 2 1 1 1 2 1 2 2 1 2 1 2 2 2 2 2     | 0.01786   |
| 22         | 2 1 2 2 1 1 1 2 1 2 2 2 2 1 1 1 1 1 1     | 0.01786   |
| 23         | 2 1 2 2 1 1 2 1 2 1 2 2 2 2 2 1 1 1 1     | 0.01786   |
| 24         | 2 1 2 2 1 1 2 1 2 1 2 2 2 2 2 1 2 2 2     | 0.01786   |
| 25         | 2 1 2 2 1 1 2 2 1 2 1 2 2 1 1 1 1 1 1     | 0.01786   |
| 26         | 2 1 2 2 2 2 2 1 2 1 2 2 2 2 2 1 2 2 2     | 0.01786   |
| 27         | 2 2 1 1 1 1 2 1 2 1 2 1 2 1 2 1 1 1 1     | 0.01786   |
| 28         | 2 2 1 2 1 1 1 1 2 1 2 1 2 1 2 1 2 2 2     | 0.01786   |
| 29         | 2 2 1 2 1 1 2 1 2 1 2 2 2 2 2 1 1 1 1     | 0.01786   |

**Table A2 - Haplotype frequency distribution of GAW dataset.**

| Serial No. | Haplotype                                   | Frequency |
|------------|---------------------------------------------|-----------|
| 1          | 1 1 1 1 1 1 1 1 1 1 1 1 1 1 1 1 1 1 1 1     | 0.432     |
| 2          | 2 1 2 2 1 1 1 1 1 2 2 2 2 2 1 2 1 1 1 2     | 0.093     |
| 3          | 1 1 1 1 1 1 1 1 1 1 1 1 1 1 1 1 1 1 2 1     | 0.0845    |
| 4          | 1 2 1 1 1 2 2 2 2 1 1 1 2 1 1 2 2 2 1 1     | 0.0485    |
| 5          | 2 1 2 2 1 1 1 1 1 2 2 2 2 2 1 2 1 1 2 2     | 0.0365    |
| 6          | 1 1 1 2 1 1 1 2 2 2 2 1 2 2 1 2 1 1 2 1     | 0.0315    |
| 7          | 1 1 1 2 1 1 1 1 1 2 2 2 2 2 1 2 1 1 2 2     | 0.0285    |
| 8          | 1 1 1 1 1 1 1 1 1 1 1 1 1 1 2 1 1 1 1 1     | 0.024     |
| 9          | 1 1 1 1 1 1 1 1 1 1 1 1 1 1 1 1 1 1 2 2     | 0.021     |
| 10         | 1 1 1 1 2 1 1 1 1 2 1 1 1 1 1 2 1 1 1 1     | 0.0205    |
| 11         | 1 1 2 1 1 1 1 1 1 1 1 1 1 1 1 1 1 1 2 1     | 0.0185    |
| 12         | 1 1 1 1 1 1 1 1 1 2 2 1 1 1 1 2 1 1 1 1     | 0.0165    |
| 13         | 1 1 2 2 1 1 1 1 1 1 1 1 2 1 1 2 1 2 2 2     | 0.0135    |
| 14         | 1 1 1 1 2 1 1 1 1 2 2 1 1 1 1 2 1 1 2 1     | 0.0105    |
| 15         | 1 1 2 1 1 2 2 2 2 1 1 1 2 1 1 2 1 1 1 1     | 0.01      |
| 16         | 1 1 1 1 1 1 1 1 1 2 2 2 2 2 1 2 1 1 1 2     | 0.0095    |
| 17         | 1 2 1 1 1 2 2 2 2 1 1 1 2 1 1 2 1 1 1 1     | 0.0095    |
| 18         | 1 1 1 1 2 1 1 1 1 2 2 1 1 1 1 2 2 2 1 1     | 0.009     |
| 19         | 1 1 1 1 1 1 1 1 1 2 2 1 1 1 1 2 1 1 2 2     | 0.0085    |
| 20         | 1 1 1 1 2 1 1 1 1 1 1 1 2 1 1 2 1 1 2 2     | 0.007     |
| 21         | 1 1 2 2 1 1 1 1 1 1 1 1 2 1 1 2 1 1 2 2     | 0.0065    |
| 22         | 1 2 1 1 1 2 2 2 2 1 1 1 2 1 1 2 2 2 2 1     | 0.006     |
| 23         | 2 1 2 2 1 1 1 1 1 2 2 1 1 1 1 2 1 1 1 1     | 0.0055    |
| 24         | 1 1 1 1 1 1 1 1 1 2 2 1 1 2 1 2 1 1 1 2     | 0.005     |
| 25         | 1 1 1 2 1 1 1 2 2 2 2 1 2 2 1 2 1 1 2 2     | 0.0045    |
| 26         | 1 2 1 1 1 2 2 2 2 1 1 1 2 1 1 2 1 1 2 1     | 0.0045    |
| 27         | 1 2 1 1 1 2 2 2 2 1 1 1 2 1 2 2 1 1 1 1     | 0.0045    |
| 28         | 1 1 1 2 1 1 1 2 2 2 2 1 2 2 1 2 1 1 1 1     | 0.0035    |
| 29         | 1 1 1 1 1 1 1 1 1 1 1 1 1 1 1 1 1 1 1 2     | 0.003     |
| 30         | 1 1 1 1 1 1 1 1 1 1 1 1 1 1 1 1 2 1 1 2     | 0.0025    |
| 31         | 2 1 2 2 1 1 1 1 1 2 2 2 2 2 1 2 1 1 1 1     | 0.002     |
| 32         | 1 1 1 1 1 1 1 1 1 1 1 1 1 1 1 1 2 1 1 2     | 0.0015    |
| 33         | 1 1 1 1 1 1 1 1 1 1 1 1 1 1 1 1 2 1 1 1     | 0.001     |
| 34         | 1 2 1 1 1 2 2 2 2 1 1 1 1 1 1 1 1 1 2 2     | 0.001     |
| 35         | 1 2 1 1 1 2 2 2 2 1 1 1 2 1 1 2 1 1 1 2     | 0.001     |
| 36         | 2 1 2 2 1 1 1 1 1 1 1 1 1 1 1 1 1 1 1 1     | 0.001     |
| 37         | 1 1 1 1 1 1 1 1 1 1 1 1 1 1 1 1 1 2 2 1 1   | 0.0005    |
| 38         | 1 1 1 1 1 1 1 1 1 1 1 1 1 1 1 1 2 1 1 2 1   | 0.0005    |
| 39         | 1 1 1 1 1 1 1 1 1 1 1 1 1 1 1 1 2 2 2 1 1   | 0.0005    |
| 40         | 1 1 1 1 1 1 1 1 1 1 1 1 1 1 1 1 2 2 2 2 1   | 0.0005    |
| 41         | 1 1 1 1 1 1 1 1 1 1 1 1 1 1 2 1 1 1 1 2 2   | 0.0005    |
| 42         | 1 1 1 1 1 1 1 1 1 1 1 1 1 1 2 1 2 1 1 1 2   | 0.0005    |
| 43         | 1 1 1 1 1 1 1 1 1 1 1 1 1 1 2 1 2 1 1 2 1   | 0.0005    |
| 44         | 1 1 1 1 1 1 1 1 1 1 1 1 1 2 1 1 2 2 2 1 1   | 0.0005    |
| 45         | 1 1 1 1 1 1 1 1 1 1 1 1 1 2 2 1 2 1 1 1 2   | 0.0005    |
| 46         | 1 1 1 1 1 1 1 1 1 1 1 1 1 2 2 1 2 1 1 2 1   | 0.0005    |
| 47         | 1 1 1 1 1 1 1 1 1 1 2 2 1 1 1 1 1 1 1 1 1   | 0.0005    |
| 48         | 1 1 1 1 1 1 1 1 1 2 2 1 1 2 1 2 1 2 1 1 2 2 | 0.0005    |

|    |                                         |        |
|----|-----------------------------------------|--------|
| 49 | 1 1 1 1 1 1 1 1 1 2 2 1 2 2 1 2 1 1 2 1 | 0.0005 |
| 50 | 1 1 1 1 1 1 1 2 2 1 1 1 2 1 1 2 2 2 1 1 | 0.0005 |
| 51 | 1 1 1 2 1 1 1 1 1 1 1 1 1 1 1 1 1 1 1 1 | 0.0005 |
| 52 | 1 1 1 2 1 1 1 1 1 2 2 2 2 2 1 2 1 1 1 1 | 0.0005 |
| 53 | 1 1 1 2 1 1 1 2 2 1 1 1 1 1 1 1 1 1 1 1 | 0.0005 |
| 54 | 1 1 1 2 1 1 1 2 2 2 2 1 2 2 1 2 1 1 1 2 | 0.0005 |
| 55 | 1 1 1 2 1 1 1 2 2 2 2 1 2 2 1 2 2 2 1 1 | 0.0005 |
| 56 | 1 1 2 1 1 1 1 1 1 1 1 1 1 1 1 1 1 1 2 2 | 0.0005 |
| 57 | 1 1 2 1 1 1 1 1 1 1 1 1 1 1 1 2 2 2 1 1 | 0.0005 |
| 58 | 1 1 2 1 1 2 2 2 2 1 1 1 1 1 1 1 1 1 1 1 | 0.0005 |
| 59 | 1 1 2 1 1 2 2 2 2 1 1 1 2 1 1 2 1 1 1 2 | 0.0005 |
| 60 | 1 1 2 1 1 2 2 2 2 1 1 1 2 1 1 2 1 1 2 1 | 0.0005 |
| 61 | 1 1 2 2 1 1 1 1 1 2 2 2 2 2 1 2 1 1 2 2 | 0.0005 |
| 62 | 1 2 1 1 1 1 1 1 1 1 1 1 1 1 1 1 1 1 1 1 | 0.0005 |
| 63 | 1 2 1 1 1 2 2 2 2 1 1 1 2 1 1 2 2 2 1 2 | 0.0005 |
| 64 | 2 1 1 1 1 1 1 1 1 1 1 1 1 1 1 1 1 1 1 1 | 0.0005 |
| 65 | 2 1 2 2 1 1 1 1 1 2 2 2 2 2 1 1 1 1 1 1 | 0.0005 |

**Table A3 - Power of F\_HapMiner and the single-locus TDT (SL-TDT) using GAW dataset on the single locus model (sample size = 50 pedigrees).**

| SNP | MAF    | Penetrance Set A |            | Penetrance Set B |            | Penetrance Set C |            |
|-----|--------|------------------|------------|------------------|------------|------------------|------------|
|     |        | SL-TDT           | F_HapMiner | SL-TDT           | F_HapMiner | SL-TDT           | F_HapMiner |
| 1   | 0.139  | 0.50             | 0.83       | 0.97             | 1.00       | 0.96             | 1.00       |
| 2   | 0.076  | 0.24             | 0.56       | 0.92             | 0.99       | 0.91             | 1.00       |
| 3   | 0.19   | 0.49             | 0.70       | 0.87             | 0.99       | 0.97             | 1.00       |
| 4   | 0.2295 | 0.64             | 0.89       | 0.93             | 0.99       | 0.99             | 1.00       |
| 5   | 0.047  | 0.07             | 0.20       | 0.20             | 0.43       | 0.24             | 0.31       |
| 6   | 0.087  | 0.34             | 0.56       | 0.96             | 1.00       | 0.97             | 1.00       |
| 7   | 0.087  | 0.38             | 0.67       | 0.98             | 1.00       | 0.96             | 1.00       |
| 8   | 0.1285 | 0.46             | 0.76       | 0.96             | 1.00       | 0.98             | 1.00       |
| 9   | 0.1285 | 0.48             | 0.73       | 0.95             | 1.00       | 0.96             | 1.00       |
| 10  | 0.2885 | 0.56             | 0.87       | 0.92             | 0.98       | 0.99             | 1.00       |
| 11  | 0.268  | 0.68             | 0.91       | 0.94             | 1.00       | 0.99             | 1.00       |
| 12  | 0.171  | 0.56             | 0.82       | 0.92             | 1.00       | 0.99             | 1.00       |
| 13  | 0.3265 | 0.62             | 0.90       | 0.80             | 0.98       | 0.98             | 1.00       |
| 14  | 0.244  | 0.61             | 0.82       | 0.78             | 0.99       | 0.97             | 1.00       |
| 15  | 0.0045 | 0.01             | 0.01       | 0.03             | 0.02       | 0.01             | 0.01       |
| 16  | 0.41   | 0.49             | 0.67       | 0.65             | 0.81       | 0.98             | 1.00       |
| 17  | 0.0675 | 0.28             | 0.49       | 0.93             | 1.00       | 0.84             | 0.97       |
| 18  | 0.081  | 0.21             | 0.59       | 0.89             | 0.98       | 0.79             | 0.99       |
| 19  | 0.289  | 0.08             | 0.19       | 0.14             | 0.32       | 0.20             | 0.32       |
| 20  | 0.247  | 0.58             | 0.73       | 0.77             | 0.93       | 0.96             | 1.00       |

**Figure A1 - A CEPH pedigree**

Typical CEPH pedigrees in our simulation have two or three generations with 4-20 members.

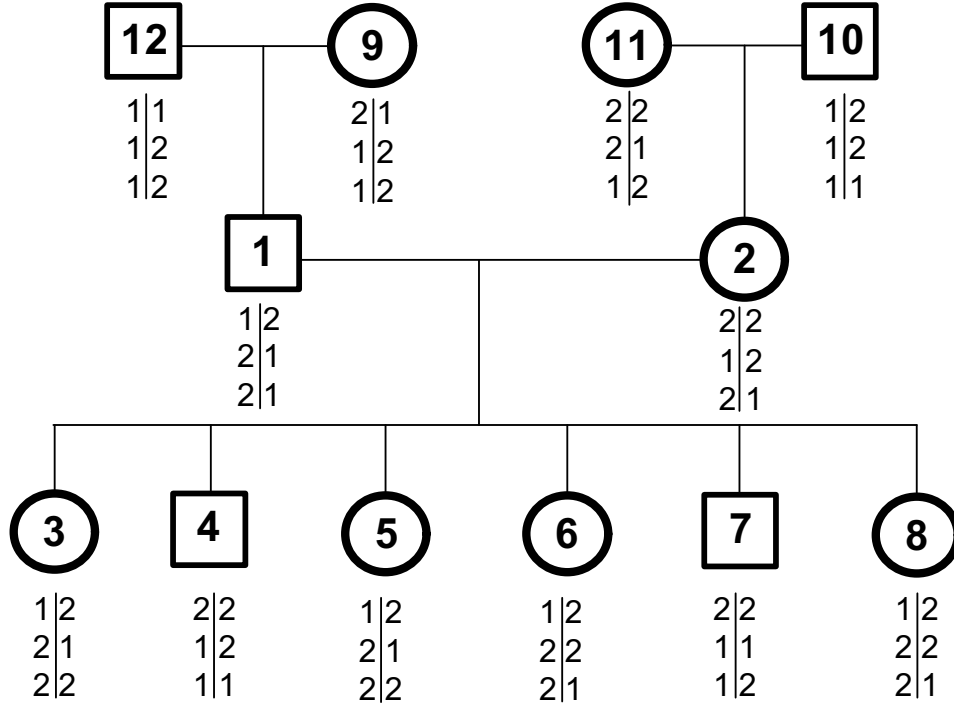

**Figure A2 - The LD plot of the CF dataset**

The block structure was generated based on haplotype frequencies of the CF data using the program of HaploView. It clearly shows that no nearby SNPs are in high LD with SNP 4.

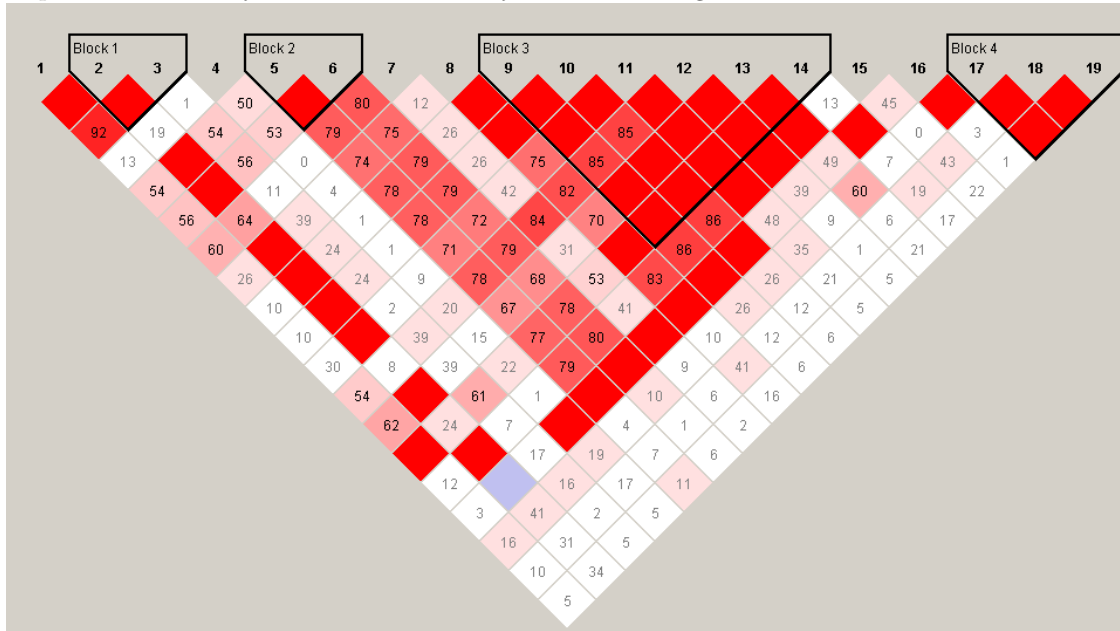

**Figure A3 - The LD plot of the GAW dataset**

The block structure was generated based on haplotype frequencies of the GAW data using HaploView. The block structure clearly shows that no SNPs are in high LD with SNP 19.

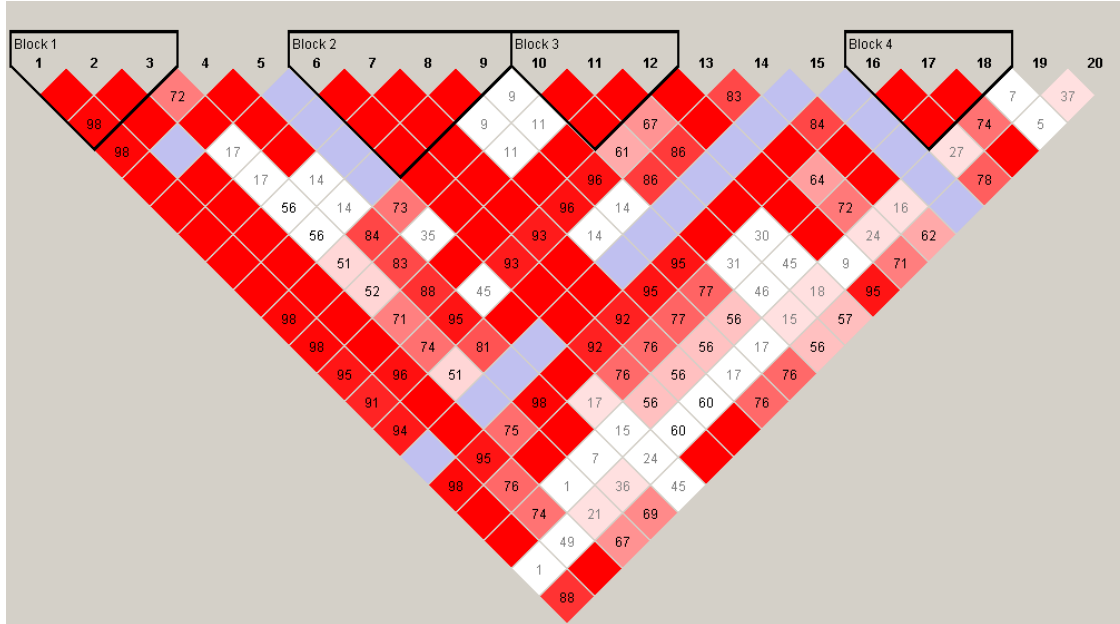

**Figure A4 - Effect of Sample Sizes**

Power of F.HapMiner increases when the sample size increases from 200, to 300, and 400. Result is based on the rare haplotype model with the penetrance set A.

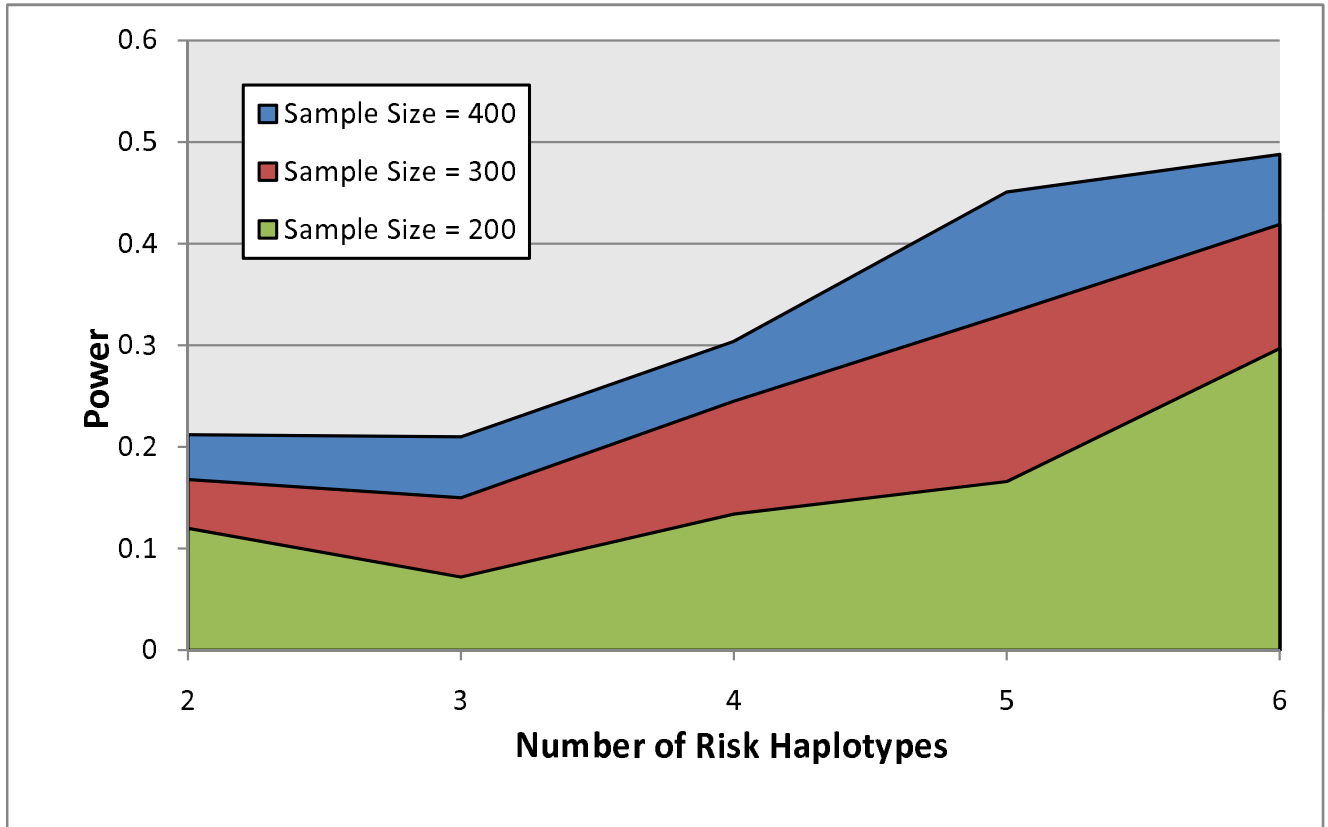

Supplement: 1471-2105-11-S1-S45-S1.pdf [file 1471-2105-11-S1-S45-S1.pdf]
